# Supplementary material for: Dietary-Induced Bacterial Metabolites Reduce Inflammation and Inflammation-Associated Cancer via Vitamin D Pathway
Source: MDPI journal article supplement (doi:10.3390/ijms24031864), 2023-01-18
Supplement: s1 [file s1]

**Supplementary Table S1 – Diet composition**

|                                      | <b>Low fat diet (D12450H)</b> |               | <b>High fat diet (D12451)</b> |               |
|--------------------------------------|-------------------------------|---------------|-------------------------------|---------------|
| <b>Energy</b>                        | <b>Grams %</b>                | <b>Kcal %</b> | <b>Grams %</b>                | <b>Kcal %</b> |
| Protein                              | 19.2                          | 20            | 24                            | 20            |
| Carbohydrate                         | 67.3                          | 70            | 41                            | 35            |
| Fat                                  | 4.3                           | 10            | 24                            | 45            |
| <i>Total</i>                         |                               | <i>100</i>    |                               | <i>100</i>    |
| <i>Kcal/gm</i>                       | <i>3.85</i>                   |               | <i>4.7</i>                    |               |
| <b>Ingredients</b>                   | <b>Grams</b>                  | <b>Kcal</b>   | <b>Grams</b>                  | <b>Kcal</b>   |
| Casein, lactic, 30 Mesh              | 200                           | 800           | 200                           | 800           |
| L-cysteine                           | 3                             | 12            | 3                             | 12            |
| Corn starch                          | 452.2                         | 1808.8        | 72.8                          | 291           |
| Maltodextrin10                       | 75                            | 300           | 100                           | 400           |
| Sucrose, fine granulated             | 172.8                         | 691           | 172.8                         | 691           |
| Cellulose BW200                      | 50                            | 0             | 50                            | 0             |
| Soybean oil                          | 25                            | 225           | 25                            | 225           |
| Lard*                                | 20                            | 180           | 177.5                         | 1598          |
| Mineral Mix S10026                   | 10                            | 0             | 10                            | 0             |
| Dicalcium phosphate                  | 13                            | 0             | 13                            | 0             |
| Calcium Carbonate                    | 5.5                           | 0             | 5.5                           | 0             |
| Potassium citrate, 1H <sub>2</sub> O | 16.5                          | 0             | 16.5                          | 0             |
| Vitamin mix V10001                   | 10                            | 40            | 10                            | 40            |
| Choline bitartatre                   | 2                             | 0             | 2                             | 0             |
| FD&C yellow dye 5                    | 0.04                          | 0             | 0                             | 0             |
| FD&C red dye 40                      | 0.01                          | 0             | 0.05                          | 0             |

\* Cholesterol = 51.6 mg/gram

**Supplementary Table S2 - mAbs used in flow cytometry**

| <b>Target Molecule</b> | <b>Clone</b> | <b>Isotype</b> | <b>Conjugate</b> | <b>Source</b>  |
|------------------------|--------------|----------------|------------------|----------------|
| <b>CD3</b>             | 145-2C11     | IgG1           | PE or PE Cy7     | Biolegend      |
| <b>CD49b</b>           | DX5          | IgM            | APC              | Biolegend      |
| <b>CD69</b>            | H1.2F3       | IgG            | PE Cy7           | Biolegend      |
| <b>CD4</b>             | GK1.5        | IgG2b, κ       | PE               | BD Biosciences |
| <b>Foxp3</b>           | FJK-16s      | IgG1a          | APC              | eBiosciences   |
| <b>CD8</b>             | 53-6.7       | IgG2a, κ       | FITC             | Biolegend      |
| <b>CD11c</b>           | HL3          | IgG1, λ2       | PE               | BD Biosciences |
| <b>CD19</b>            | 6D5          | IgG2a, κ       | APC              | Biolegend      |
| <b>F4 80</b>           | BM8          | IgG2a, κ       | FITC             | Biolegend      |
| <b>Ly6G</b>            | RB6-8C5      | IgG2b, κ       | FITC             | BD Biosciences |
| <b>MHC II</b>          | AF6-120.1    | IgG2a, κ       | APC              | Biolegend      |
| <b>CD86</b>            | GL1          | IgG2a, κ       | FITC             | BD Biosciences |

**Supplementary Table S3 – Bile acids used in the study**

| Number | Analyte                    | [MW] <sup>-H</sup> | Neutral Formula                                               | RT    | R <sub>2</sub> Value |
|--------|----------------------------|--------------------|---------------------------------------------------------------|-------|----------------------|
| 1      | Taurine                    | 124.0068           | C <sub>2</sub> H <sub>7</sub> NO <sub>3</sub> S               | 0.75  | 0.962082             |
| 2      | Dehydrocholic Acid         | 401.2328           | C <sub>24</sub> H <sub>34</sub> O <sub>5</sub>                | 2.00  | 0.986751             |
| 3      | Lithocholic Acid           | 375.2899           | C <sub>24</sub> H <sub>40</sub> O <sub>3</sub>                | 21.72 | 0.968442             |
| 4      | Hyodeoxycholic Acid        | 391.2848           | C <sub>24</sub> H <sub>40</sub> O <sub>4</sub>                | 9.40  | 0.994262             |
| 5      | Chenodeoxycholic Acid      | 391.2848           | C <sub>24</sub> H <sub>40</sub> O <sub>4</sub>                | 18.38 | 0.995447             |
| 6      | Ursodeoxycholic aAid       | 391.2848           | C <sub>24</sub> H <sub>40</sub> O <sub>4</sub>                | 11.97 | 0.994563             |
| 7      | Deoxycholic Acid           | 391.2848           | C <sub>24</sub> H <sub>40</sub> O <sub>4</sub>                | 19.13 | 0.9897113            |
| 8      | Cholic Acid                | 407.2797           | C <sub>24</sub> H <sub>40</sub> O <sub>5</sub>                | 13.01 | 0.894385             |
| 9      | Hyocholic Acid             | 407.2797           | C <sub>24</sub> H <sub>40</sub> O <sub>5</sub>                | 11.39 | 0.993712             |
| 10     | Taurocholic Acid           | 514.2838           | C <sub>26</sub> H <sub>45</sub> NO <sub>7</sub> S             | 5.29  | 0.993712             |
| 11     | Taurohyocholic Acid        | 514.2838           | C <sub>26</sub> H <sub>45</sub> NO <sub>7</sub> S             | 2.12  | 0.992805             |
| 12     | Taurochenodeoxycholic Acid | 498.2889           | C <sub>26</sub> H <sub>45</sub> NO <sub>6</sub> S             | 8.99  | 0.991546             |
| 13     | Tauroursodeoxycholic Acid  | 498.2889           | C <sub>26</sub> H <sub>45</sub> NO <sub>6</sub> S             | 3.20  | 0.988966             |
| 14     | Taurodeoxycholic Acid      | 498.2889           | C <sub>26</sub> H <sub>45</sub> NO <sub>6</sub> S             | 10.27 | 0.991519             |
| 15     | Taurohyodeoxycholic Acid   | 498.2889           | C <sub>26</sub> H <sub>45</sub> NO <sub>6</sub> S             | 3.76  | 0.987378             |
| 16     | Taurolithocholic Acid      | 482.2940           | C <sub>26</sub> H <sub>45</sub> NO <sub>5</sub> S             | 14.61 | 0.988162             |
| 17     | α-Muricholic Acid          | 407.2797           | C <sub>24</sub> H <sub>40</sub> O <sub>5</sub>                | 6.52  | 0.995697             |
| 18     | β-Muricholic Acid          | 407.2797           | C <sub>24</sub> H <sub>40</sub> O <sub>5</sub>                | 6.93  | 0.998331             |
| 19     | ω-Muricholic Acid          | 407.2797           | C <sub>24</sub> H <sub>40</sub> O <sub>5</sub>                | 5.80  | 0.978579             |
| 20     | Tauro α-Muricholic Acid    | 514.2838           | C <sub>26</sub> H <sub>45</sub> NO <sub>7</sub> S             | 1.63  | 0.995563             |
| 21     | Tauro β-Muricholic Acid    | 514.2838           | C <sub>26</sub> H <sub>45</sub> NO <sub>7</sub> S             | 1.19  | 0.980216             |
| 22     | Tauro ω-Muricholic Acid    | 514.2838           | C <sub>26</sub> H <sub>45</sub> NO <sub>7</sub> S             | 1.80  | 0.988878             |
| D1     | Cholic Acid d4             | 411.3049           | C <sub>24</sub> H <sub>36</sub> D <sub>4</sub> O <sub>5</sub> | 13.01 | NA                   |
| D2     | Chenodeoxycholic Acid d4   | 395.3099           | C <sub>24</sub> H <sub>36</sub> D <sub>4</sub> O <sub>4</sub> | 18.31 | NA                   |

**Supplementary Table S4 – Faecal microbiota composition in Control groups in the Chronic-Colitis and Colitis-associated cancer (CAC) study**

**a) Phylum**

|                 | Week 5 |        |       |        |                      |             | Week 7 |        |       |        |                     |             | Week 15 |        |       |        |                        |             |
|-----------------|--------|--------|-------|--------|----------------------|-------------|--------|--------|-------|--------|---------------------|-------------|---------|--------|-------|--------|------------------------|-------------|
|                 | LF     |        | HF    |        | p-value              | Adj p-value | LF     |        | HF    |        | p-value             | Adj p-value | LF      |        | HF    |        | p-value                | Adj p-value |
|                 | Mean   | Median | Mean  | Median |                      |             | Mean   | Median | Mean  | Median |                     |             | Mean    | Median | Mean  | Median |                        |             |
| Actinobacteria  | 13.10  | 15.05  | 3.96  | 2.48   | 0.007 <sup>###</sup> | 0.021*      | 4.81   | 5.50   | 3.04  | 0.61   | 0.399               | 0.565       | 1.60    | 1.11   | 1.83  | 1.79   | 0.798                  | 0.798       |
| Bacteroidetes   | 23.05  | 22.82  | 35.75 | 38.51  | 0.161                | 0.234       | 30.55  | 34.36  | 20.70 | 19.51  | 0.108               | 0.216       | 33.77   | 29.69  | 29.25 | 21.90  | 0.328                  | 0.606       |
| Deferribacteres | 0.86   | 0.33   | 3.76  | 1.57   | 0.195                | 0.234       | 0.91   | 0.16   | 0.19  | 0.18   | 0.651               | 0.651       | 1.69    | 1.44   | 1.98  | 0.43   | 0.505                  | 0.606       |
| Firmicutes      | 61.73  | 62.05  | 56.31 | 56.75  | 0.382                | 0.382       | 62.94  | 59.63  | 76.00 | 75.65  | 0.043               | 0.128       | 61.47   | 66.49  | 66.84 | 71.14  | 0.442                  | 0.606       |
| Proteobacteria  | 1.23   | 1.36   | 0.10  | 0.00   | 0.002 <sup>###</sup> | 0.01**      | 0.78   | 0.66   | 0.08  | 0.03   | 0.004 <sup>##</sup> | 0.021*      | 1.43    | 0.49   | 0.00  | 0.00   | 0.0004 <sup>####</sup> | 0.002**     |
| unclassified    | 0.03   | 0.00   | 0.12  | 0.10   | 0.178                | 0.234       | 0.01   | 0.00   | 0.00  | 0.00   | 0.470               | 0.565       | 0.04    | 0.00   | 0.11  | 0.07   | 0.217                  | 0.606       |

p-value: # p < 0.05, ## p < 0.01; ### p < 0.001 - LF-fed control mice compared to HF-fed control mice

Adjusted p-value: \* p < 0.05, \*\* p < 0.01 - LF-fed control mice compared to HF-fed control mice. P-values were adjusted for multiple testing using the Benjamini-Hochberg method

**b) Family**

|                     | Week 5 |        |       |        |                        |             | Week 7 |        |       |        |                        |             | Week 15 |        |       |        |                    |             |
|---------------------|--------|--------|-------|--------|------------------------|-------------|--------|--------|-------|--------|------------------------|-------------|---------|--------|-------|--------|--------------------|-------------|
|                     | LF     |        | HF    |        | p-value                | Adj p-value | LF     |        | HF    |        | p-value                | Adj p-value | LF      |        | HF    |        | p-value            | Adj p-value |
|                     | Mean   | Median | Mean  | Median |                        |             | Mean   | Median | Mean  | Median |                        |             | Mean    | Median | Mean  | Median |                    |             |
| Bacteroidaceae      | 3.76   | 3.19   | 11.86 | 8.00   | 0.161                  | 0.353       | 4.24   | 5.07   | 8.33  | 6.67   | 0.228                  | 0.542       | 8.44    | 7.19   | 9.76  | 5.40   | 0.798              | 0.878       |
| Bifidobacteriaceae  | 13.10  | 15.05  | 3.96  | 2.48   | 0.007 <sup>###</sup>   | 0.019*      | 4.81   | 5.50   | 3.04  | 0.61   | 0.399                  | 0.549       | 1.60    | 1.11   | 1.83  | 1.79   | 0.798              | 0.878       |
| Deferribacteraceae  | 0.86   | 0.33   | 3.76  | 1.57   | 0.195                  | 0.357       | 0.91   | 0.16   | 0.19  | 0.18   | 0.651                  | 0.728       | 1.69    | 1.44   | 1.98  | 0.43   | 0.505              | 0.878       |
| Erysipelotrichaceae | 52.40  | 52.95  | 29.10 | 31.50  | 0.003 <sup>##</sup>    | 0.011*      | 51.22  | 48.13  | 58.91 | 60.98  | 0.345                  | 0.542       | 47.05   | 41.82  | 43.79 | 49.42  | 0.798              | 0.878       |
| Lachnospiraceae     | 4.38   | 4.53   | 13.93 | 14.39  | 0.001 <sup>####</sup>  | 0.006**     | 6.24   | 5.49   | 4.56  | 3.71   | 0.345                  | 0.542       | 8.04    | 7.06   | 12.86 | 12.12  | 0.442              | 0.878       |
| Lactobacillaceae    | 2.96   | 1.47   | 4.65  | 4.38   | 0.382                  | 0.526       | 2.48   | 1.51   | 5.01  | 3.54   | 0.345                  | 0.542       | 1.87    | 1.69   | 6.08  | 1.92   | 0.645              | 0.878       |
| Porphyromonadaceae  | 10.07  | 9.31   | 11.15 | 11.52  | 0.721                  | 0.793       | 10.32  | 9.54   | 7.77  | 8.22   | 0.345                  | 0.542       | 14.89   | 14.26  | 12.93 | 9.96   | 0.328              | 0.878       |
| Rikenellaceae       | 7.73   | 7.98   | 9.37  | 7.52   | 0.878                  | 0.878       | 14.44  | 15.44  | 2.79  | 3.15   | 0.0006 <sup>####</sup> | 0.007**     | 8.15    | 6.48   | 3.91  | 2.70   | 0.059              | 0.322       |
| Ruminococcaceae     | 1.88   | 2.04   | 8.39  | 8.09   | 0.0002 <sup>####</sup> | 0.002**     | 2.88   | 2.85   | 7.35  | 7.15   | 0.02 <sup>#</sup>      | 0.110       | 4.32    | 3.17   | 3.93  | 3.04   | 0.878              | 0.878       |
| Sutterellaceae      | 0.26   | 0.15   | 0.10  | 0.00   | 0.351                  | 0.526       | 0.06   | 0.00   | 0.07  | 0.03   | 0.775                  | 0.775       | 0.89    | 0.03   | 0.00  | 0.00   | 0.032 <sup>#</sup> | 0.322       |
| unclassified        | 2.61   | 2.19   | 3.73  | 2.62   | 0.645                  | 0.789       | 2.39   | 2.06   | 1.98  | 1.76   | 0.662                  | 0.728       | 3.09    | 2.82   | 2.93  | 2.56   | 0.721              | 0.878       |

p-value: # p < 0.05, ## p < 0.01; ### p < 0.001 - LF-fed control mice compared to HF-fed control mice

Adjusted p-value: \* p <0.05, \*\* p < 0.01 - LF-fed control mice compared to HF-fed control mice. P-values were adjusted for multiple testing using the Benjamini-Hochberg method

c) Genus

|                  | Week 5 |        |       |        |                       |             | Week 7 |        |       |        |                       |             | Week 15 |        |       |        |                     |             |
|------------------|--------|--------|-------|--------|-----------------------|-------------|--------|--------|-------|--------|-----------------------|-------------|---------|--------|-------|--------|---------------------|-------------|
|                  | LF     |        | HF    |        |                       |             | LF     |        | HF    |        |                       |             | LF      |        | HF    |        |                     |             |
|                  | Mean   | Median | Mean  | Median | p-value               | Adj p-value | Mean   | Median | Mean  | Median | p-value               | Adj p-value | Mean    | Median | Mean  | Median | p-value             | Adj p-value |
| Alistipes        | 7.73   | 7.98   | 9.37  | 7.52   | 0.878                 | 0.878       | 14.44  | 15.44  | 2.79  | 3.15   | 0.0001 <sup>###</sup> | 0.012*      | 8.15    | 6.48   | 3.91  | 2.70   | 0.059               | 0.176       |
| Allobaculum      | 52.39  | 52.95  | 27.71 | 30.49  | 0.002 <sup>##</sup>   | 0.011*      | 51.22  | 48.13  | 58.46 | 59.78  | 0.345                 | 0.677       | 47.05   | 41.82  | 41.72 | 45.58  | 0.574               | 0.861       |
| Bacteroides      | 3.76   | 3.19   | 11.86 | 8.00   | 0.161                 | 0.263       | 4.24   | 5.07   | 8.33  | 6.67   | 0.228                 | 0.587       | 8.44    | 7.19   | 9.76  | 5.40   | 0.798               | 0.878       |
| Barnesiella      | 1.53   | 1.45   | 2.60  | 2.51   | 0.234                 | 0.325       | 1.90   | 1.91   | 3.15  | 2.21   | 0.755                 | 0.930       | 4.34    | 3.72   | 4.09  | 2.43   | 0.130               | 0.335       |
| Bifidobacterium  | 13.10  | 15.05  | 3.96  | 2.48   | 0.007 <sup>##</sup>   | 0.025*      | 4.81   | 5.50   | 3.04  | 0.61   | 0.399                 | 0.677       | 1.60    | 1.11   | 1.83  | 1.79   | 0.798               | 0.878       |
| Clostridium_XIVa | 0.02   | 0.00   | 1.40  | 0.45   | 0.002 <sup>##</sup>   | 0.011*      | 0.11   | 0.00   | 0.83  | 0.87   | 0.007 <sup>##</sup>   | 0.061       | 0.26    | 0.07   | 0.75  | 0.79   | 0.023 <sup>#</sup>  | 0.117       |
| Dorea            | 0.43   | 0.41   | 1.14  | 0.85   | 0.010 <sup>#</sup>    | 0.027*      | 0.52   | 0.40   | 0.78  | 0.88   | 0.414                 | 0.677       | 0.46    | 0.33   | 0.46  | 0.23   | 0.878               | 0.878       |
| Flavonifractor   | 0.49   | 0.44   | 1.05  | 0.84   | 0.093                 | 0.167       | 0.33   | 0.30   | 1.58  | 0.45   | 0.755                 | 0.930       | 0.28    | 0.14   | 0.26  | 0.13   | 0.875               | 0.878       |
| Johnsonella      | 0.01   | 0.00   | 0.22  | 0.09   | 0.03 <sup>#</sup>     | 0.067       | 0.03   | 0.00   | 0.13  | 0.06   | 0.133                 | 0.400       | 0.10    | 0.04   | 0.03  | 0.00   | 0.305               | 0.668       |
| Lactobacillus    | 2.96   | 1.47   | 4.65  | 4.38   | 0.382                 | 0.405       | 2.48   | 1.51   | 5.01  | 3.54   | 0.345                 | 0.677       | 1.87    | 1.69   | 6.08  | 1.92   | 0.645               | 0.878       |
| Mucispirillum    | 0.86   | 0.33   | 3.76  | 1.57   | 0.195                 | 0.292       | 0.91   | 0.16   | 0.19  | 0.18   | 0.651                 | 0.930       | 1.69    | 1.44   | 1.98  | 0.43   | 0.505               | 0.861       |
| Odoribacter      | 0.47   | 0.49   | 1.35  | 0.70   | 0.328                 | 0.394       | 0.53   | 0.57   | 0.99  | 0.34   | 1.000                 | 1.000       | 0.70    | 0.90   | 0.58  | 0.47   | 0.574               | 0.861       |
| Oscillibacter    | 0.43   | 0.40   | 1.89  | 1.91   | 0.0001 <sup>###</sup> | 0.011*      | 0.74   | 0.43   | 2.03  | 1.80   | 0.059                 | 0.267       | 0.70    | 0.55   | 1.29  | 1.25   | 0.028 <sup>#</sup>  | 0.117       |
| Parabacteroides  | 0.51   | 0.46   | 0.36  | 0.16   | 0.051                 | 0.103       | 0.46   | 0.31   | 0.32  | 0.30   | 0.852                 | 0.958       | 3.15    | 2.75   | 0.93  | 0.25   | 0.007 <sup>##</sup> | 0.063       |
| Parasutterella   | 0.26   | 0.15   | 0.10  | 0.00   | 0.351                 | 0.395       | 0.06   | 0.00   | 0.07  | 0.03   | 0.775                 | 0.930       | 0.89    | 0.03   | 0.00  | 0.00   | 0.032 <sup>#</sup>  | 0.117       |
| Sporobacter      | 0.05   | 0.02   | 0.11  | 0.06   | 0.298                 | 0.383       | 0.01   | 0.00   | 0.06  | 0.00   | 0.928                 | 0.983       | 0.01    | 0.00   | 0.03  | 0.00   | 0.334               | 0.668       |
| Turicibacter     | 0.01   | 0.00   | 1.39  | 1.01   | 0.002 <sup>##</sup>   | 0.011*      | 0.00   | 0.00   | 0.44  | 0.06   | 0.039 <sup>#</sup>    | 0.233       | 0.00    | 0.00   | 2.07  | 0.62   | 0.005 <sup>##</sup> | 0.063       |
| unclassified     | 15.00  | 16.08  | 27.08 | 28.04  | 0.010 <sup>#</sup>    | 0.027*      | 17.21  | 16.06  | 11.80 | 11.14  | 0.108                 | 0.388       | 20.32   | 18.54  | 24.22 | 21.06  | 0.798               | 0.878       |

p-value: # p <0.05, ## p < 0.01; ### p < 0.001 - LF-fed control mice compared to HF-fed control mice

Adjusted p-value: \* p <0.05 - LF-fed control mice compared to HF-fed control mice. P-values were adjusted for multiple testing using the Benjamini-Hochberg method

## Supplementary Table S5 – Faecal microbiota composition in Chronic-Colitis groups

### a) Phylum

|                 | Week 5 |        |       |        |         |             | Week 7 |        |       |        |                    |             | Week 15 |        |       |        |         |             |
|-----------------|--------|--------|-------|--------|---------|-------------|--------|--------|-------|--------|--------------------|-------------|---------|--------|-------|--------|---------|-------------|
|                 | LF     |        | HF    |        |         |             | LF     |        | HF    |        |                    |             | LF      |        | HF    |        |         |             |
|                 | Mean   | Median | Mean  | Median | p-value | Adj p-value | Mean   | Median | Mean  | Median | p-value            | Adj p-value | Mean    | Median | Mean  | Median | p-value | Adj p-value |
| Actinobacteria  | 2.35   | 1.10   | 5.13  | 1.45   | 0.840   | 0.840       | 0.45   | 0.12   | 3.89  | 0.40   | 0.148              | 0.178       | 1.02    | 1.13   | 3.27  | 2.47   | 0.056   | 0.167       |
| Bacteroidetes   | 23.57  | 21.28  | 29.58 | 30.11  | 0.351   | 0.702       | 44.81  | 44.26  | 29.59 | 32.29  | 0.020 <sup>#</sup> | 0.078       | 29.74   | 28.92  | 31.70 | 40.18  | 0.659   | 0.930       |
| Deferribacteres | 6.91   | 5.99   | 7.29  | 4.62   | 0.778   | 0.840       | 0.42   | 0.20   | 0.66  | 0.73   | 0.534              | 0.534       | 4.98    | 2.56   | 6.14  | 2.50   | 0.930   | 0.930       |
| Firmicutes      | 65.77  | 65.03  | 57.32 | 60.31  | 0.238   | 0.702       | 43.10  | 40.36  | 60.24 | 59.48  | 0.026 <sup>#</sup> | 0.078       | 54.43   | 62.02  | 55.14 | 51.92  | 0.930   | 0.930       |
| Proteobacteria  | 1.34   | 1.02   | 0.60  | 0.37   | 0.109   | 0.652       | 11.21  | 10.34  | 5.59  | 4.17   | 0.062              | 0.124       | 9.78    | 8.78   | 3.66  | 2.64   | 0.046   | 0.167       |
| unclassified    | 0.06   | 0.05   | 0.08  | 0.05   | 0.764   | 0.840       | 0.00   | 0.00   | 0.04  | 0.00   | 0.118              | 0.177       | 0.04    | 0.00   | 0.08  | 0.00   | 0.359   | 0.718       |

p-value: # p < 0.05, ## p < 0.01; ### p < 0.001 - LF-fed colitis mice compared to HF-fed colitis mice

Adjusted p-value: \* p < 0.05, \*\* p < 0.01 - LF-fed colitis mice compared to HF-fed colitis mice. P-values were adjusted for multiple testing using the Benjamini-Hochberg method

### b) Family

|                     | Week 5 |        |       |        |                     |             | Week 7 |        |       |        |                        |                       | Week 15 |        |       |        |                    |             |
|---------------------|--------|--------|-------|--------|---------------------|-------------|--------|--------|-------|--------|------------------------|-----------------------|---------|--------|-------|--------|--------------------|-------------|
|                     | LF     |        | HF    |        |                     |             | LF     |        | HF    |        |                        |                       | LF      |        | HF    |        |                    |             |
|                     | Mean   | Median | Mean  | Median | p-value             | Adj p-value | Mean   | Median | Mean  | Median | p-value                | Adj p-value           | Mean    | Median | Mean  | Median | p-value            | Adj p-value |
| Bacteroidaceae      | 6.41   | 4.28   | 14.31 | 7.57   | 0.272               | 0.499       | 30.93  | 34.64  | 18.89 | 20.91  | 0.020 <sup>#</sup>     | 0.075                 | 14.68   | 13.56  | 18.46 | 19.63  | 0.328              | 0.516       |
| Bifidobacteriaceae  | 2.35   | 1.10   | 5.13  | 1.45   | 0.840               | 0.840       | 0.45   | 0.12   | 3.89  | 0.40   | 0.148                  | 0.326                 | 1.02    | 1.13   | 3.27  | 2.47   | 0.056              | 0.242       |
| Deferribacteraceae  | 6.91   | 5.99   | 7.29  | 4.62   | 0.778               | 0.840       | 0.42   | 0.20   | 0.66  | 0.73   | 0.534                  | 0.599                 | 4.98    | 2.56   | 6.14  | 2.50   | 0.930              | 0.930       |
| Erysipelotrichaceae | 40.28  | 33.74  | 37.72 | 35.10  | 0.840               | 0.840       | 37.69  | 34.55  | 44.05 | 42.87  | 0.442                  | 0.599                 | 37.54   | 36.67  | 42.52 | 41.74  | 0.659              | 0.725       |
| Lachnospiraceae     | 15.99  | 13.22  | 11.44 | 6.31   | 0.177               | 0.474       | 0.77   | 0.50   | 8.34  | 7.52   | 0.00003 <sup>###</sup> | 0.0003 <sup>***</sup> | 13.33   | 6.99   | 7.48  | 3.92   | 0.211              | 0.452       |
| Lactobacillaceae    | 4.46   | 3.39   | 2.51  | 1.43   | 0.215               | 0.474       | 4.08   | 1.76   | 1.93  | 1.27   | 0.657                  | 0.657                 | 0.68    | 0.10   | 1.83  | 0.80   | 0.067              | 0.242       |
| Porphyromonadaceae  | 10.39  | 10.74  | 6.11  | 5.23   | 0.009 <sup>##</sup> | 0.100       | 10.58  | 10.48  | 8.86  | 8.23   | 0.545                  | 0.599                 | 11.91   | 10.98  | 6.39  | 5.32   | 0.044 <sup>#</sup> | 0.242       |
| Rikenellaceae       | 5.01   | 3.58   | 7.25  | 7.45   | 0.091               | 0.474       | 2.66   | 1.75   | 1.25  | 0.74   | 0.247                  | 0.428                 | 2.48    | 1.99   | 5.45  | 2.10   | 0.246              | 0.452       |
| Ruminococcaceae     | 4.77   | 4.72   | 5.56  | 6.69   | 0.545               | 0.749       | 0.56   | 0.40   | 5.73  | 3.75   | 0.002 <sup>##</sup>    | 0.011 <sup>*</sup>    | 2.65    | 1.72   | 3.17  | 3.10   | 0.536              | 0.655       |
| Sutterellaceae      | 0.74   | 0.38   | 0.43  | 0.14   | 0.184               | 0.474       | 5.50   | 3.58   | 1.98  | 1.09   | 0.090                  | 0.249                 | 5.12    | 3.78   | 0.76  | 0.09   | 0.088              | 0.242       |
| unclassified        | 2.68   | 1.79   | 2.25  | 1.81   | 0.395               | 0.621       | 6.36   | 4.64   | 4.42  | 2.57   | 0.272                  | 0.428                 | 5.60    | 3.84   | 4.52  | 4.35   | 0.536              | 0.655       |

p-value: # p < 0.05, ## p < 0.01; ### p < 0.001 - LF-fed colitis mice compared to HF-fed colitis mice

Adjusted p-value: \* p < 0.05, \*\*\* p < 0.001 - LF-fed colitis mice compared to HF-fed colitis mice. P-values were adjusted for multiple testing using the Benjamini-Hochberg method

c) Genus

|                  | Week 5 |        |       |        |                     |             | Week 7 |        |       |        |                     |             | Week 15 |        |       |        |         |             |
|------------------|--------|--------|-------|--------|---------------------|-------------|--------|--------|-------|--------|---------------------|-------------|---------|--------|-------|--------|---------|-------------|
|                  | LF     |        | HF    |        | p-value             | Adj p-value | LF     |        | HF    |        | p-value             | Adj p-value | LF      |        | HF    |        | p-value | Adj p-value |
|                  | Mean   | Median | Mean  | Median |                     |             | Mean   | Median | Mean  | Median |                     |             | Mean    | Median | Mean  | Median |         |             |
| Alistipes        | 5.01   | 3.58   | 7.25  | 7.45   | 0.091               | 0.409       | 2.66   | 1.75   | 1.25  | 0.74   | 0.247               | 0.343       | 2.48    | 1.99   | 5.45  | 2.10   | 0.246   | 0.419       |
| Allobaculum      | 40.16  | 33.64  | 37.66 | 35.10  | 0.840               | 0.890       | 37.59  | 34.55  | 44.02 | 42.82  | 0.442               | 0.568       | 37.54   | 36.67  | 42.47 | 41.74  | 0.659   | 0.747       |
| Bacteroides      | 6.41   | 4.28   | 14.31 | 7.57   | 0.272               | 0.570       | 30.93  | 34.64  | 18.89 | 20.91  | 0.020 <sup>#</sup>  | 0.073       | 14.68   | 13.56  | 18.46 | 19.63  | 0.328   | 0.505       |
| Barnesiella      | 1.20   | 1.06   | 2.16  | 1.79   | 0.075               | 0.409       | 4.87   | 4.13   | 3.86  | 2.93   | 0.600               | 0.635       | 3.05    | 2.20   | 2.14  | 1.69   | 0.479   | 0.582       |
| Bifidobacterium  | 2.35   | 1.10   | 5.13  | 1.45   | 0.840               | 0.890       | 0.45   | 0.12   | 3.89  | 0.40   | 0.148               | 0.248       | 1.02    | 1.13   | 3.27  | 2.47   | 0.056   | 0.295       |
| Clostridium_XIVa | 0.04   | 0.00   | 0.77  | 0.05   | 0.348               | 0.570       | 0.04   | 0.00   | 0.34  | 0.17   | 0.013 <sup>#</sup>  | 0.071       | 0.39    | 0.15   | 1.11  | 0.33   | 0.147   | 0.357       |
| Dorea            | 0.90   | 0.83   | 0.99  | 0.89   | 0.717               | 0.890       | 0.07   | 0.00   | 0.46  | 0.38   | 0.010 <sup>#</sup>  | 0.071       | 0.39    | 0.38   | 0.17  | 0.16   | 0.234   | 0.419       |
| Flavonifractor   | 0.54   | 0.29   | 0.37  | 0.19   | 0.429               | 0.643       | 0.04   | 0.00   | 0.32  | 0.10   | 0.198               | 0.297       | 0.49    | 0.30   | 0.13  | 0.08   | 0.356   | 0.505       |
| Johnsonella      | 0.08   | 0.06   | 0.05  | 0.00   | 0.089               | 0.409       | 0.00   | 0.00   | 0.06  | 0.00   | 0.104               | 0.208       | 0.20    | 0.00   | 0.01  | 0.00   | 0.456   | 0.582       |
| Lactobacillus    | 4.46   | 3.39   | 2.51  | 1.43   | 0.215               | 0.570       | 4.08   | 1.76   | 1.93  | 1.27   | 0.657               | 0.657       | 0.68    | 0.10   | 1.83  | 0.80   | 0.067   | 0.295       |
| Mucispirillum    | 6.91   | 5.99   | 7.29  | 4.62   | 0.778               | 0.890       | 0.42   | 0.20   | 0.66  | 0.73   | 0.534               | 0.601       | 4.98    | 2.56   | 6.14  | 2.50   | 0.930   | 0.930       |
| Odoribacter      | 0.49   | 0.29   | 0.40  | 0.29   | 0.967               | 0.967       | 0.00   | 0.00   | 0.04  | 0.00   | 0.104               | 0.208       | 0.00    | 0.00   | 0.00  | 0.00   | NA      | NA          |
| Oscillibacter    | 1.10   | 1.18   | 1.31  | 1.46   | 0.492               | 0.681       | 0.16   | 0.00   | 0.74  | 0.49   | 0.008 <sup>##</sup> | 0.071       | 0.70    | 0.37   | 0.92  | 1.21   | 0.205   | 0.419       |
| Parabacteroides  | 2.28   | 1.41   | 0.28  | 0.25   | 0.004 <sup>##</sup> | 0.079       | 2.25   | 2.16   | 1.29  | 1.07   | 0.152               | 0.248       | 3.28    | 2.08   | 0.78  | 0.66   | 0.085   | 0.295       |
| Parasutterella   | 0.74   | 0.38   | 0.43  | 0.14   | 0.184               | 0.570       | 5.50   | 3.58   | 1.98  | 1.09   | 0.090               | 0.208       | 5.12    | 3.78   | 0.76  | 0.09   | 0.088   | 0.295       |
| Sporobacter      | 0.03   | 0.00   | 0.22  | 0.00   | 0.287               | 0.570       | 0.00   | 0.00   | 0.08  | 0.00   | 0.038 <sup>#</sup>  | 0.113       | 0.05    | 0.00   | 0.05  | 0.00   | 0.889   | 0.930       |
| Turicibacter     | 0.12   | 0.00   | 0.06  | 0.00   | 0.338               | 0.570       | 0.10   | 0.00   | 0.02  | 0.00   | 0.475               | 0.570       | 0.00    | 0.00   | 0.05  | 0.00   | 0.082   | 0.295       |
| unclassified     | 27.17  | 26.31  | 18.81 | 11.47  | 0.238               | 0.570       | 10.83  | 10.50  | 20.16 | 18.24  | 0.016 <sup>#</sup>  | 0.071       | 24.95   | 25.67  | 16.25 | 18.81  | 0.104   | 0.295       |

p-value: # p < 0.05, ## p < 0.01 - LF-fed colitis mice compared to HF-fed colitis mice

NA – not applicable

## Supplementary Table S6 – Faecal microbiota composition in Colitis associated cancer (CAC) groups

### a) Phylum

|                 | Week 5 |        |       |        |                      |             | Week 7 |        |       |        |                      |             | Week 15 |        |       |        |                     |             |
|-----------------|--------|--------|-------|--------|----------------------|-------------|--------|--------|-------|--------|----------------------|-------------|---------|--------|-------|--------|---------------------|-------------|
|                 | LF     |        | HF    |        |                      |             | LF     |        | HF    |        |                      |             | LF      |        | HF    |        |                     |             |
|                 | Mean   | Median | Mean  | Median | p-value              | Adj p-value | Mean   | Median | Mean  | Median | p-value              | Adj p-value | Mean    | Median | Mean  | Median | p-value             | Adj p-value |
| Actinobacteria  | 4.30   | 3.23   | 7.84  | 6.19   | 0.183                | 0.219       | 1.01   | 0.25   | 1.59  | 1.93   | 0.558                | 0.836       | 1.03    | 0.68   | 2.48  | 2.44   | 0.079               | 0.158       |
| Bacteroidetes   | 33.79  | 33.11  | 21.60 | 18.89  | 0.021 <sup>#</sup>   | 0.062       | 44.64  | 42.63  | 20.91 | 19.06  | 0.045 <sup>#</sup>   | 0.090       | 43.57   | 39.91  | 32.67 | 25.97  | 0.315               | 0.473       |
| Deferribacteres | 6.25   | 4.67   | 1.07  | 0.66   | 0.152                | 0.219       | 2.38   | 1.15   | 3.33  | 2.19   | 0.724                | 0.869       | 3.35    | 0.67   | 2.04  | 0.30   | 0.414               | 0.497       |
| Firmicutes      | 53.69  | 54.13  | 68.79 | 66.32  | 0.009 <sup>###</sup> | 0.056       | 42.58  | 43.14  | 71.33 | 74.04  | 0.006 <sup>###</sup> | 0.037*      | 41.39   | 46.43  | 59.23 | 55.95  | 0.079               | 0.158       |
| Proteobacteria  | 1.96   | 1.34   | 0.69  | 0.42   | 0.121                | 0.219       | 9.38   | 8.19   | 2.83  | 1.17   | 0.019 <sup>#</sup>   | 0.056       | 10.61   | 9.75   | 3.56  | 2.12   | 0.004 <sup>##</sup> | 0.025*      |
| unclassified    | 0.00   | 0.00   | 0.01  | 0.00   | 0.350                | 0.350       | 0.01   | 0.00   | 0.01  | 0.00   | 0.907                | 0.907       | 0.05    | 0.00   | 0.02  | 0.00   | 0.674               | 0.674       |

p-value: # p < 0.05, ## p < 0.01; ### p < 0.001 - LF-fed CAC mice compared to HF-fed CAC mice

Adjusted p-value: \* p < 0.05 - LF-fed CAC mice compared to HF-fed CAC mice. P-values were adjusted for multiple testing using the Benjamini-Hochberg method

### b) Family

|                     | Week 5 |        |       |        |                       |             | Week 7 |        |       |        |                      |             | Week 15 |        |       |        |                    |             |
|---------------------|--------|--------|-------|--------|-----------------------|-------------|--------|--------|-------|--------|----------------------|-------------|---------|--------|-------|--------|--------------------|-------------|
|                     | LF     |        | HF    |        |                       |             | LF     |        | HF    |        |                      |             | LF      |        | HF    |        |                    |             |
|                     | Mean   | Median | Mean  | Median | p-value               | Adj p-value | Mean   | Median | Mean  | Median | p-value              | Adj p-value | Mean    | Median | Mean  | Median | p-value            | Adj p-value |
| Bacteroidaceae      | 14.08  | 13.59  | 9.81  | 6.41   | 0.336                 | 0.462       | 34.91  | 33.44  | 11.88 | 12.45  | 0.006 <sup>##</sup>  | 0.034*      | 27.07   | 26.19  | 17.81 | 14.10  | 0.315              | 0.546       |
| Bifidobacteriaceae  | 4.30   | 3.23   | 7.84  | 6.19   | 0.183                 | 0.297       | 1.01   | 0.25   | 1.59  | 1.93   | 0.558                | 0.767       | 1.03    | 0.68   | 2.48  | 2.44   | 0.079              | 0.289       |
| Deferribacteraceae  | 6.25   | 4.67   | 1.07  | 0.66   | 0.152                 | 0.297       | 2.38   | 1.15   | 3.33  | 2.19   | 0.724                | 0.846       | 3.35    | 0.67   | 2.04  | 0.30   | 0.414              | 0.546       |
| Erysipelotrichaceae | 43.35  | 45.20  | 52.92 | 52.15  | 0.189                 | 0.297       | 33.80  | 31.29  | 57.03 | 57.87  | 0.065                | 0.239       | 33.01   | 31.86  | 52.63 | 53.23  | 0.053              | 0.289       |
| Lachnospiraceae     | 5.69   | 3.85   | 5.77  | 4.51   | 0.779                 | 0.857       | 3.43   | 2.43   | 6.81  | 5.08   | 0.284                | 0.626       | 5.47    | 2.43   | 2.64  | 2.32   | 0.780              | 0.858       |
| Lactobacillaceae    | 1.81   | 0.39   | 6.21  | 4.95   | 0.043 <sup>#</sup>    | 0.156       | 2.53   | 0.96   | 1.54  | 1.36   | 1.000                | 1.000       | 0.22    | 0.07   | 1.26  | 0.34   | 0.281              | 0.546       |
| Porphyromonadaceae  | 10.53  | 10.51  | 6.97  | 6.76   | 0.029 <sup>#</sup>    | 0.156       | 7.99   | 9.39   | 6.95  | 6.96   | 0.524                | 0.767       | 11.51   | 10.63  | 8.49  | 9.11   | 0.447              | 0.546       |
| Rikenellaceae       | 7.62   | 8.48   | 4.06  | 4.66   | 0.094                 | 0.258       | 1.29   | 0.66   | 1.84  | 1.16   | 0.093                | 0.256       | 4.16    | 2.74   | 5.36  | 2.15   | 0.968              | 0.968       |
| Ruminococcaceae     | 2.52   | 1.78   | 3.78  | 2.31   | 0.5358                | 0.655       | 2.66   | 2.27   | 5.81  | 7.02   | 0.354                | 0.650       | 2.35    | 1.61   | 2.50  | 2.56   | 0.356              | 0.546       |
| Sutterellaceae      | 1.19   | 0.49   | 0.62  | 0.33   | 0.862                 | 0.862       | 3.83   | 2.22   | 2.65  | 1.06   | 0.769                | 0.846       | 2.81    | 3.21   | 0.44  | 0.08   | 0.258              | 0.546       |
| unclassified        | 2.64   | 2.25   | 0.95  | 0.98   | 0.0003 <sup>###</sup> | 0.003**     | 6.17   | 6.46   | 0.57  | 0.51   | 0.0016 <sup>##</sup> | 0.017*      | 9.02    | 8.47   | 4.35  | 3.19   | 0.017 <sup>#</sup> | 0.189       |

p-value: # p < 0.05, ## p < 0.01; ### p < 0.001 - LF-fed CAC mice compared to HF-fed CAC mice

Adjusted p-value: \* p < 0.05 - LF-fed CAC mice compared to HF-fed CAC mice. P-values were adjusted for multiple testing using the Benjamini-Hochberg method

### c) Genus



|                  | Week 5 |        |       |        |                     |             | Week 7 |        |       |        |                     |             | Week 15 |        |       |        |                     |             |
|------------------|--------|--------|-------|--------|---------------------|-------------|--------|--------|-------|--------|---------------------|-------------|---------|--------|-------|--------|---------------------|-------------|
|                  | LF     |        | HF    |        |                     |             | LF     |        | HF    |        |                     |             | LF      |        | HF    |        |                     |             |
|                  | Mean   | Median | Mean  | Median | p-value             | Adj p-value | Mean   | Median | Mean  | Median | p-value             | Adj p-value | Mean    | Median | Mean  | Median | p-value             | Adj p-value |
| Alistipes        | 7.62   | 8.48   | 4.06  | 4.66   | 0.094               | 0.252       | 1.29   | 0.66   | 1.84  | 1.16   | 0.093               | 0.226       | 4.16    | 2.74   | 5.36  | 2.15   | 0.968               | 0.968       |
| Allobaculum      | 43.18  | 45.15  | 52.92 | 52.15  | 0.189               | 0.310       | 33.32  | 31.18  | 57.03 | 57.87  | 0.065               | 0.185       | 33.01   | 31.86  | 52.63 | 53.23  | 0.053               | 0.224       |
| Bacteroides      | 14.08  | 13.59  | 9.81  | 6.41   | 0.336               | 0.503       | 34.91  | 33.44  | 11.88 | 12.45  | 0.006 <sup>##</sup> | 0.035*      | 27.07   | 26.19  | 17.81 | 14.10  | 0.315               | 0.447       |
| Barnesiella      | 3.07   | 2.61   | 2.10  | 1.79   | 0.613               | 0.788       | 3.59   | 3.41   | 3.42  | 2.99   | 1.000               | 1.000       | 3.89    | 3.42   | 3.63  | 2.16   | 0.604               | 0.642       |
| Bifidobacterium  | 4.30   | 3.23   | 7.84  | 6.19   | 0.183               | 0.310       | 1.01   | 0.25   | 1.59  | 1.93   | 0.558               | 0.948       | 1.03    | 0.68   | 2.48  | 2.44   | 0.079               | 0.224       |
| Clostridium XIVa | 0.04   | 0.00   | 0.50  | 0.41   | 0.009 <sup>##</sup> | 0.079       | 0.01   | 0.00   | 0.22  | 0.11   | 0.003 <sup>##</sup> | 0.035*      | 0.12    | 0.00   | 0.24  | 0.24   | 0.162               | 0.342       |
| Dorea            | 0.53   | 0.56   | 0.50  | 0.33   | 1.000               | 1.000       | 0.24   | 0.19   | 0.21  | 0.14   | 1.000               | 1.000       | 0.16    | 0.00   | 0.15  | 0.09   | 0.517               | 0.612       |
| Flavonifractor   | 0.15   | 0.00   | 0.54  | 0.42   | 0.120               | 0.271       | 0.25   | 0.12   | 0.52  | 0.51   | 0.711               | 1.000       | 0.27    | 0.19   | 0.09  | 0.08   | 0.008 <sup>##</sup> | 0.075       |
| Johnsonella      | 0.08   | 0.05   | 0.33  | 0.11   | 0.428               | 0.592       | 0.00   | 0.00   | 0.93  | 0.11   | 0.006 <sup>##</sup> | 0.035*      | 0.45    | 0.00   | 0.20  | 0.22   | 0.181               | 0.342       |
| Lactobacillus    | 1.81   | 0.39   | 6.21  | 4.95   | 0.043 <sup>#</sup>  | 0.192       | 2.53   | 0.96   | 1.54  | 1.36   | 1.000               | 1.000       | 0.22    | 0.07   | 1.26  | 0.34   | 0.281               | 0.434       |
| Mucispirillum    | 6.25   | 4.67   | 1.07  | 0.66   | 0.152               | 0.304       | 2.38   | 1.15   | 3.33  | 2.19   | 0.724               | 1.000       | 3.35    | 0.67   | 2.04  | 0.30   | 0.414               | 0.541       |
| Odoribacter      | 0.52   | 0.37   | 0.09  | 0.00   | 0.036 <sup>#</sup>  | 0.192       | 0.00   | 0.00   | 0.00  | 0.00   | NA                  | NA          | 0.00    | 0.00   | 0.03  | 0.00   | 0.146               | 0.342       |
| Oscillibacter    | 0.55   | 0.45   | 0.50  | 0.44   | 0.955               | 1.000       | 0.33   | 0.21   | 0.80  | 0.64   | 0.164               | 0.348       | 0.55    | 0.35   | 0.54  | 0.32   | 0.540               | 0.612       |
| Parabacteroides  | 1.58   | 1.09   | 0.38  | 0.33   | 0.006 <sup>##</sup> | 0.079       | 2.60   | 1.69   | 0.50  | 0.17   | 0.019 <sup>#</sup>  | 0.079       | 4.19    | 2.57   | 1.10  | 0.52   | 0.013 <sup>#</sup>  | 0.075       |
| Parasutterella   | 1.19   | 0.49   | 0.62  | 0.33   | 0.862               | 0.970       | 3.83   | 2.22   | 2.65  | 1.06   | 0.769               | 1.000       | 2.81    | 3.21   | 0.44  | 0.08   | 0.258               | 0.434       |
| Sporobacter      | 0.01   | 0.00   | 0.08  | 0.08   | 0.073               | 0.252       | 0.00   | 0.00   | 0.01  | 0.00   | 0.268               | 0.507       | 0.00    | 0.00   | 0.09  | 0.06   | 0.010 <sup>##</sup> | 0.075       |
| Turicibacter     | 0.17   | 0.00   | 0.00  | 0.00   | 0.098               | 0.252       | 0.48   | 0.11   | 0.00  | 0.00   | 0.045 <sup>#</sup>  | 0.154       | 0.00    | 0.00   | 0.00  | 0.00   | NA                  | NA          |
| unclassified     | 14.85  | 12.58  | 12.46 | 11.23  | 0.694               | 0.833       | 13.23  | 12.95  | 13.54 | 12.30  | 0.833               | 1.000       | 18.72   | 14.79  | 11.90 | 9.93   | 0.079               | 0.224       |

p-value: # p < 0.05, ## p < 0.01; ### p < 0.001 - LF-fed CAC mice compared to HF-fed CAC mice

Adjusted p-value: \* p < 0.05 - LF-fed CAC mice compared to HF-fed CAC mice. P-values were adjusted for multiple testing using the Benjamini-Hochberg method

NA – not applicable

**Supplementary Table S7 – Metabolic markers in mice fed either high fat (HF) or low fat (LF) diets either alone or challenged with DSS (Colitis) and AOM and DSS (CAC)**

|                             | AOM-LF-DSS <sup>a</sup> | AOM-HF-DSS <sup>a</sup> | LF-AOM-DSS <sup>b</sup> | HF-AOM-DSS <sup>b</sup> | LF-AOM <sup>c</sup> | HF-AOM <sup>c</sup>      |
|-----------------------------|-------------------------|-------------------------|-------------------------|-------------------------|---------------------|--------------------------|
| <b>% Body Fat</b>           | 13.4±1.0                | 31.7±1.6 ***            | 12.2±0.7                | 25.3±2.2 ###            | 19.9±2.5            | 32.2±5.5                 |
| <b>% Lean</b>               | 69.4±1.0                | 53.0±1.4 ***            | 69.9±0.6                | 58.2±1.9 ###            | 62.4±2.2            | 52.9±4.9                 |
| <b>Colon length (cm)</b>    | 5.4±0.2                 | 6.0±0.2 *               | 6.0 ± 0.3               | 6.1±0.1                 | 6.6±0.7             | 6.9±0.3                  |
| <b>Colon weight (mg/cm)</b> | 72.7±9.7                | 45.0±3.0 *              | 56.8±4.6                | 42.1±3.6 ##             | 29.8±5.3            | 26.7±1.6                 |
| <b>Tumor number/mouse</b>   | 11.9±2.4                | 2.3±0.8 **              | 4.5±1.1                 | 1.9±0.4 <sup>#</sup>    | 1±0.4               | 2.3±0.9 <sup>&amp;</sup> |

<sup>a</sup>AOM-LF-DSS and AOM-HF-DSS groups - Mice were injected intraperitoneally with AOM followed by feeding with LF and HF diet and exposed to 3 cycles of DSS, 5 days 1.5%DSS and 14 days of water

<sup>b</sup> LF-AOM-DSS and HF-AOM-DSS groups - Mice were fed LF and HF diet followed by intraperitoneal injection of azoxymethane (AOM) and exposed to 3 cycles of DSS, 5 days 1.5%DSS and 14 days of water

<sup>c</sup> AOM-LF and AOM-HF groups - Mice were fed LF and HF diet followed by intraperitoneal injection of AOM

All values are means ± SEMs. n=3-4/group for AOM-treated mice and 9-10 mice/group of AOM-DSS-treated mice.

\* p <0.05 and \*\* p <0.01 and \*\*\* p <0.001 for differences between AOM-HF-DSS vs AOM-LF-DSS, (ANOVA followed by post hoc correction)

<sup>#</sup> p < 0.05 and <sup>##</sup> p < 0.01 and <sup>###</sup> p < 0.001 for differences between HF-AOM-DSS vs LF-AOM-DSS, (ANOVA followed by post hoc correction)

<sup>&</sup> p =0.09 between HF-AOM vs LF-AOM, (Two-tail unpaired Student's *t*-test)

**Supplementary Table S8. Fatty acid profile in the liver of mice fed either high fat (HF) or low fat (LF) diets either alone or challenged with DSS (Colitis) and AOM and DSS (CAC)**

| Fatty Acid               | LF Control                     | LF Colitis                | LF CAC                      | HF Control                | HF Colitis                | HF CAC                      |
|--------------------------|--------------------------------|---------------------------|-----------------------------|---------------------------|---------------------------|-----------------------------|
|                          | (g/100g FAME)                  | (g/100g FAME)             | (g/100g FAME)               | (g/100g FAME)             | (g/100g FAME)             | (g/100g FAME)               |
| myristic acid/C14:0      | 0.42 ± 0.03                    | 0.42 ± 0.02               | 0.43 ± 0.02                 | 0.39 ± 0.02 <sup>a</sup>  | 0.39 ± 0.02 <sup>a</sup>  | 0.22 ± 0.02 <sup>b</sup>    |
| palmitic acid/C16:0      | 23.92 ± 0.89                   | 24.38 ± 0.47              | 24.77 ± 0.62                | 24.95 ± 0.36 <sup>a</sup> | 24.31 ± 0.40 <sup>a</sup> | 22.96 ± 0.37 <sup>b</sup>   |
| palmitoleic acid/C16:1c9 | 2.74 ± 0.14                    | 2.92 ± 0.12               | 2.86 ± 0.22                 | 2.26 ± 0.19 <sup>a</sup>  | 1.57 ± 0.20 <sup>b</sup>  | 1.48 ± 0.14 <sup>b</sup>    |
| Stearic acid/C18:0       | 11.99 ± 0.31 <sup>####</sup>   | 10.75 ± 0.50              | 11.22 ± 0.82                | 5.03 ± 0.49 <sup>a</sup>  | 10.20 ± 1.24 <sup>b</sup> | 8.34 ± 0.60 <sup>a,b</sup>  |
| oleic acid/C18:1c9       | 23.06 ± 0.49 <sup>a,####</sup> | 27.62 ± 0.98 <sup>b</sup> | 26.19 ± 1.60 <sup>a,b</sup> | 36.86 ± 1.29 <sup>a</sup> | 27.64 ± 2.31 <sup>b</sup> | 30.85 ± 1.32 <sup>a,b</sup> |
| linoleic acid /C18:2n-6  | 13.32 ± 0.32 <sup>a,#</sup>    | 10.32 ± 0.36 <sup>b</sup> | 11.13 ± 0.42 <sup>b</sup>   | 14.98 ± 0.51 <sup>a</sup> | 15.79 ± 0.46 <sup>a</sup> | 17.77 ± 0.29 <sup>b</sup>   |

|                                      |                                 |                            |                            |                          |                            |                            |
|--------------------------------------|---------------------------------|----------------------------|----------------------------|--------------------------|----------------------------|----------------------------|
| linolenic acid/C18:3n-3              | 0.35 ± 0.02 <sup>a, #</sup>     | 0.27 ± 0.01 <sup>b</sup>   | 0.30 ± 0.03 <sup>a,b</sup> | 0.27 ± 0.02 <sup>a</sup> | 0.34 ± 0.03 <sup>a,b</sup> | 0.38 ± 0.02 <sup>b</sup>   |
| γ-linoleic acid /C18:3n-6            | 0.20 ± 0.01 <sup>a, #</sup>     | 0.14 ± 0.01 <sup>b</sup>   | 0.17 ± 0.02 <sup>a,b</sup> | 0.27 ± 0.02              | 0.28 ± 0.02                | 0.29 ± 0.02                |
| dihomo-γ-linolenic acid/<br>C20:3n-6 | 1.18 ± 0.05 <sup>a, ##</sup>    | 1.04 ± 0.02 <sup>a,b</sup> | 0.94 ± 0.10 <sup>b</sup>   | 0.99 ± 0.02              | 0.99 ± 0.02                | 1.03 ± 0.04                |
| AA/C20:4n-6                          | 9.72 ± 0.40 <sup>a, #####</sup> | 8.16 ± 0.27 <sup>b</sup>   | 7.87 ± 0.52 <sup>b</sup>   | 4.63 ± 0.52 <sup>a</sup> | 7.86 ± 0.82 <sup>b</sup>   | 6.69 ± 0.39 <sup>a,b</sup> |
| EPA/C20:5n-3                         | 0.19 ± 0.01 <sup>a, ###</sup>   | 0.13 ± 0.01 <sup>b</sup>   | 0.13 ± 0.01 <sup>b</sup>   | 0.12 ± 0.01              | 0.13 ± 0.01                | 0.11 ± 0.02                |
| DPA/C22:5n-3                         | 0.25 ± 0.02 <sup>a, ##</sup>    | 0.15 ± 0.01 <sup>b</sup>   | 0.23 ± 0.01 <sup>a</sup>   | 0.34 ± 0.03              | 0.28 ± 0.01                | 0.32 ± 0.04                |
| DHA/C22:6n-3                         | 5.64 ± 0.24 <sup>a, #####</sup> | 4.32 ± 0.17 <sup>b</sup>   | 4.37 ± 0.24 <sup>b</sup>   | 2.51 ± 0.28              | 3.71 ± 0.38                | 3.23 ± 0.30                |

<sup>a,b</sup> Values in the same row which do not share a common superscript letter are significantly different,  $p < 0.05$  (ANOVA followed by post hoc Tuckey's multiple comparisons tests)

All HF groups are compared to each other only and all LF groups are compared to each other only

#, ##, ###, #### represent  $p < 0.05$ ,  $p < 0.01$ ,  $p < 0.001$  and  $p < 0.0001$ , respectively, when comparing LF vs HF control groups

arachidonic acid – AA; eicosapentaenoic acid - EPA; docosahexaenoic acid – DHA; docosapentaenoic acid – DPA

Red font – higher concentration of Fatty acid compared to respective Control.

Green font – lower concentration of Fatty acid compared to respective Control.
